# Supplementary material for: Associated factors for depression, suicidal ideation and suicide attempt among asthmatic adolescents with experience of electronic cigarette use
Source: PubMed Central journal article supplement (PMC7586912; doi:10.18332/tid/127524), 2020-10-16
Supplement: TID-18-85-s1.pdf [file TID-18-85-s1.pdf]

**Supplementary Table S1. Associated factors for asthma among 195,847 Korean adolescents from 2015 to 2017**

|                                  | Crude            |         | Adjusted         |         |
|----------------------------------|------------------|---------|------------------|---------|
|                                  | OR (95% CI)      | p-value | OR (95% CI)      | p-value |
| <b>Sex</b>                       |                  |         |                  |         |
| Female                           | Reference        |         | Reference        |         |
| Male                             | 1.35 (1.30-1.40) | <0.001  | 1.42 (1.67-1.48) | <0.001  |
| <b>Grade</b>                     |                  |         |                  |         |
| Middle school                    | 1.09 (1.04-1.13) | <0.001  | 1.17 (1.12-1.22) | <0.001  |
| High school                      | Reference        |         | Reference        |         |
| <b>Subjective economic state</b> |                  |         |                  |         |
| High                             | Reference        |         | Reference        |         |
| Middle                           | 0.90 (0.86-0.93) | <0.001  | 0.92 (0.88-0.96) | <0.001  |
| Low                              | 1.08 (1.02-1.14) | 0.004   | 1.03 (0.97-1.09) | 0.352   |
| <b>Academic achievement</b>      |                  |         |                  |         |
| High                             | Reference        |         | Reference        |         |
| Middle                           | 0.91 (0.87-0.95) | <0.001  | 0.93 (0.89-0.97) | 0.001   |
| Low                              | 0.93 (0.89-0.97) | <0.001  | 0.88 (0.85-0.92) | <0.001  |
| <b>Current drinking</b>          |                  |         |                  |         |
| No                               | Reference        |         | Reference        |         |
| Yes                              | 1.11 (1.06-1.16) | <0.001  | 1.04 (0.99-1.10) | 0.129   |
| <b>Current smoking</b>           |                  |         |                  |         |
| No                               | Reference        |         | Reference        |         |
| Yes                              | 1.26 (1.18-1.35) | <0.001  | 1.10 (1.02-1.19) | 0.019   |
| <b>Subjective healthiness</b>    |                  |         |                  |         |
| Healthy                          | Reference        |         | Reference        |         |
| Average                          | 1.39 (1.34-1.45) | <0.001  | 1.45 (1.39-1.51) | <0.001  |
| Unhealthy                        | 1.96 (1.84-2.08) | <0.001  | 1.98 (1.85-2.11) | <0.001  |
| <b>Subjective happiness</b>      |                  |         |                  |         |
| Happy                            | Reference        |         | Reference        |         |
| Average                          | 1.06 (1.02-1.10) | 0.002   | 0.94 (0.90-0.98) | 0.004   |
| Unhappy                          | 1.38 (1.30-1.47) | <0.001  | 1.00 (0.94-1.07) | 0.991   |
| <b>Perceived stress</b>          |                  |         |                  |         |
| Often                            | 1.29 (1.23-1.35) | <0.001  | 1.24 (1.17-1.31) | <0.001  |
| Sometimes                        | 1.08 (1.03-1.13) | 0.002   | 1.10 (1.05-1.15) | <0.001  |
| Never                            | Reference        |         | Reference        |         |
| <b>Sleep satisfaction</b>        |                  |         |                  |         |
| Plenty                           | Reference        |         | Reference        |         |
| A little                         | 0.99 (0.94-1.03) | 0.537   | 0.98 (0.94-1.03) | 0.481   |
| Not enough                       | 1.08 (1.03-1.12) | 0.001   | 1.02 (0.98-1.07) | 0.322   |
| <b>EC use</b>                    |                  |         |                  |         |
| No                               | Reference        |         | Reference        |         |
| Yes                              | 1.23 (1.16-1.30) | <0.001  | 1.07 (1.01-1.15) | 0.002   |

Following the selection of significant covariates, univariate and multivariate logistic regression analysis were performed to identify the associated factors for asthma. Odds ratios (OR), adjusted ORs (aORs), and confidence intervals at the 95% level (95% CIs) were obtained. EC: electronic cigarette.

© 2020 Kim C.W. et al.
